# Supplementary material
Source: Springer Nature journal article supplement (https://www.springermedizin.de/resource/supplementary/12890_2011_327_MOESM2_ESM.pdf/9504928)

## A. Risk score on admission

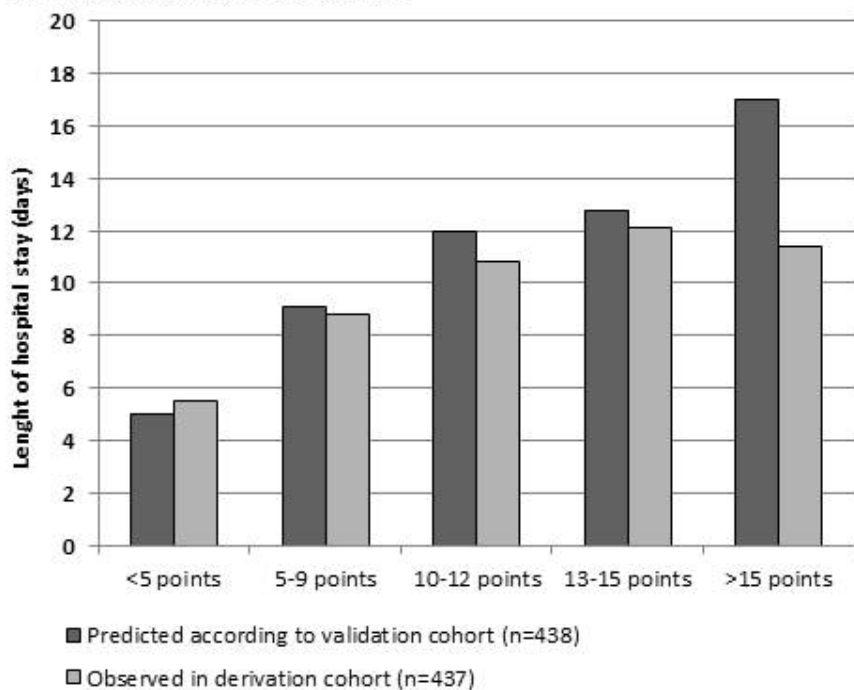

## B. Overall risk score

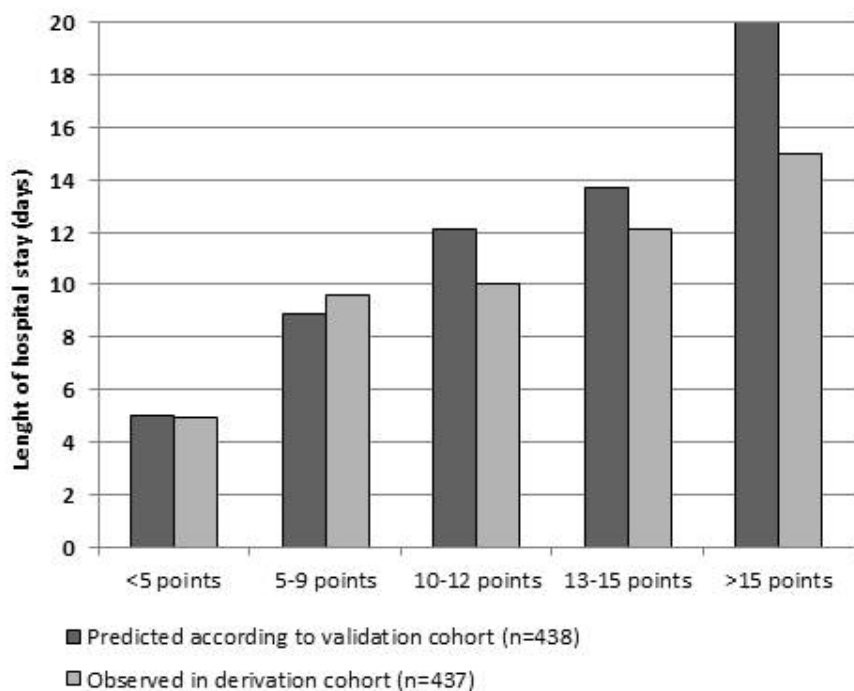

Supplement: MOESM2 [file 9504928]
